# Supplementary material
Source: publisher site journal article supplement (https://www.spandidos-publications.com/2811/downloadSupplementary)

Figure S1. Representative images of migration and invasion assays. (A) Effect of miR-1266 expression on MIHA, MHCC97 and Huh-7 cell migration (magnification, x200). (B) Effect of miR-1266 expression on MIHA, MHCC97 and Huh-7 cell invasion (magnification, x200). miR, microRNA; NC, negative control.

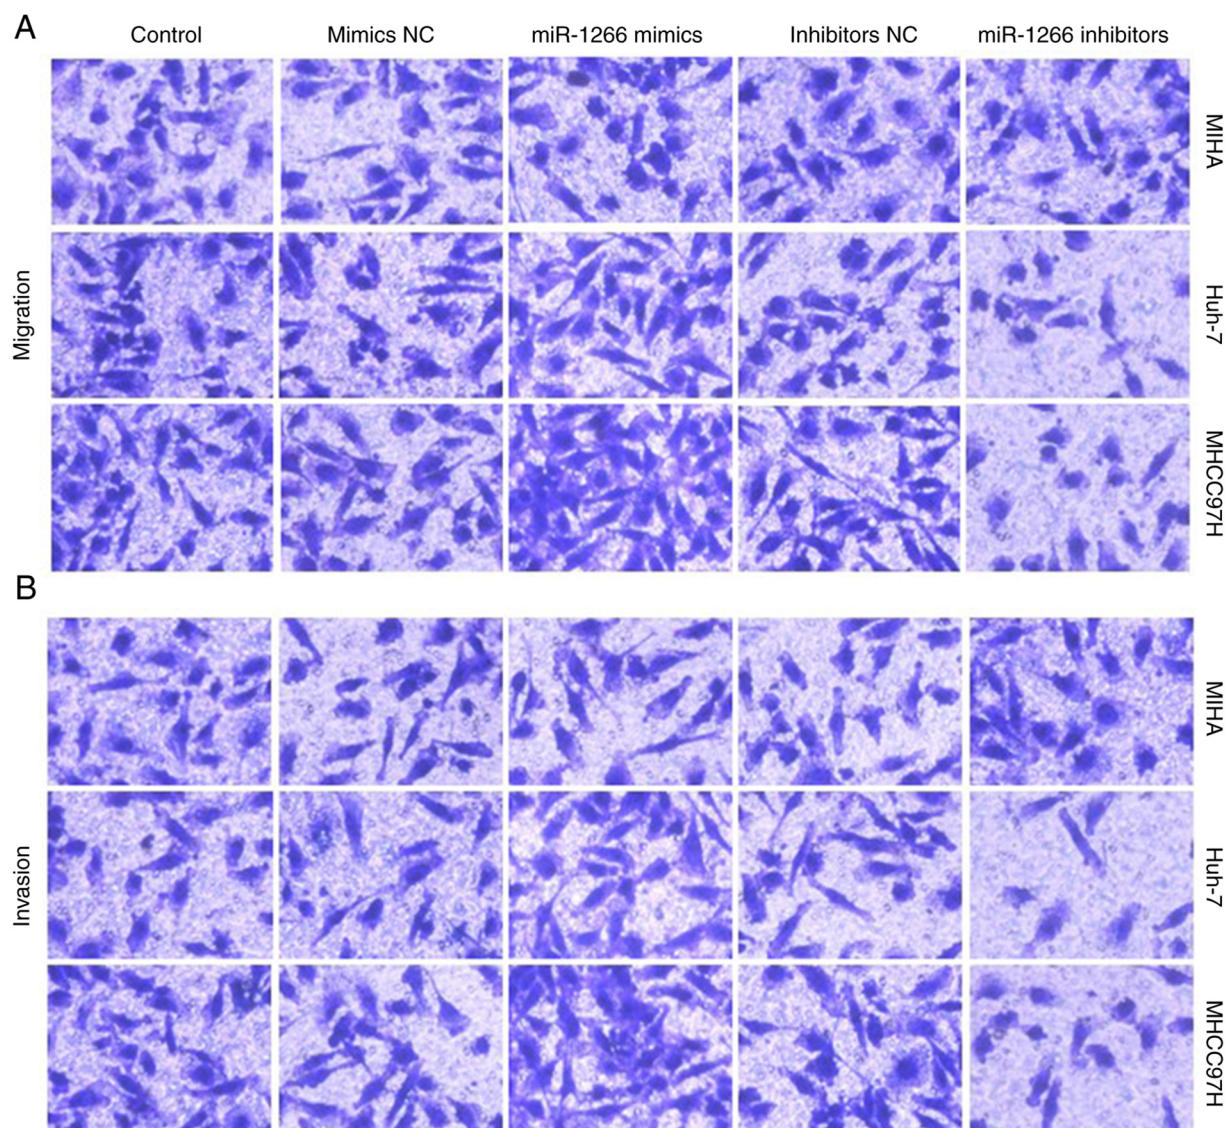

Supplement: Supplementary file 1 [file downloadSupplementary]
